# Supplementary material for: PDE4a predicts poor prognosis and promotes metastasis by inducing epithelial-mesenchymal transition in hepatocellular carcinoma
Source: PubMed Central journal article supplement — J Cancer. 2018 Jun 14;9(13):2389–96. doi: 10.7150/jca.24079 (PMC6036708; doi:10.7150/jca.24079), 2018-06-14
Supplement: jcav09p2389s1.pdf [file jcav09p2389s1.pdf]

**Supplementary fig.1**

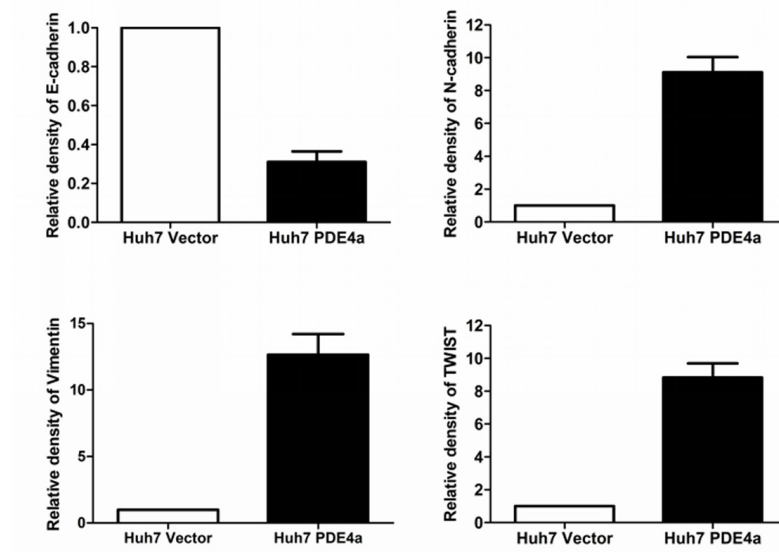

**Supplementary fig.1** The expression of E-cadherin, N-cadherin, Vimentin and TWIST evaluated by immunoblotting in both Huh7 Vector and Huh7 PDE4a cells.

**Supplementary fig.2**

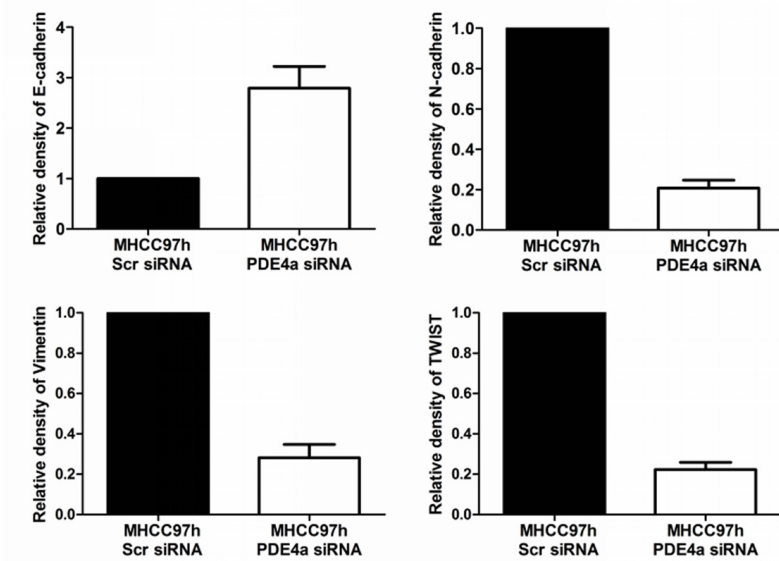

**Supplementary fig.2** The expression of E-cadherin, N-cadherin, Vimentin and TWIST assessed by immunoblotting in both MHCC97h Scr siRNA and MHCC97h PDE4a cells.
